# Supplementary material for: Activation of cannabinoid receptor type 2 attenuates surgery-induced cognitive impairment in mice through anti-inflammatory activity
Source: Springer Nature journal article supplement (doi:10.1186/s12974-017-0913-7), 2017-07-19
Supplement: MOESM1 [file 13318052]

### Performance of mice in training phase of fear conditioning

The freezing time in training phase of fear conditioning showed no significant difference among the groups (Figure. one-way ANOVA,  $F=8.564$ ,  $n=42$ ,  $p=0.110$ ), indicating the equivalent baseline of learning and memory of mice groups.

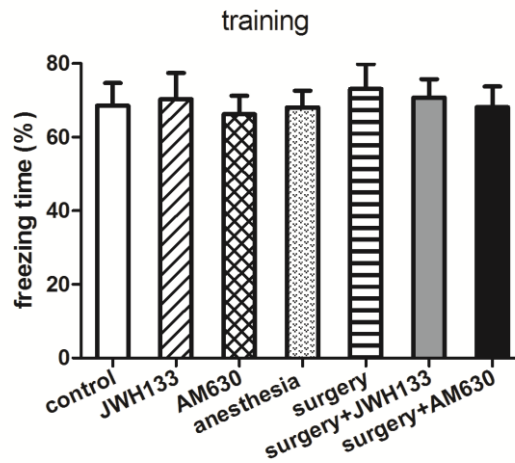

**Figure.** All mice groups showed no significant difference in freezing time of training phase of fear conditioning. Data are plotted as mean  $\pm$  standard error of the mean for each group ( $n=6$  per group).
